# TRBP maintains mammalian embryonic neural stem cell properties by acting as a novel transcriptional coactivator of the Notch signaling pathway

Sung-Hyun Byun<sup>1</sup>, Juwan Kim<sup>1</sup>, Dasol Han<sup>1</sup>, Mookwang Kwon<sup>1</sup>, Jae Youl Cho<sup>1</sup>, Hui Xuan Ng<sup>2</sup>, Samuel J. Pleasure<sup>2</sup> and Keejung Yoon<sup>1,\*</sup>

## ABSTRACT

Transactivation response element RNA-binding protein (TRBP; TARBP2) is known to play important roles in human immunodeficiency virus (HIV) replication and microRNA biogenesis. However, recent studies implicate TRBP in a variety of biological processes as a mediator of cross-talk between signal transduction pathways. Here, we provide the first evidence that TRBP is required for efficient neurosphere formation and for the expression of neural stem cell markers and Notch target genes in primary neural progenitor cells *in vitro*. Consistent with this, introduction of TRBP into the mouse embryonic brain *in utero* increased the fraction of cells expressing Sox2 in the ventricular zone. We also show that TRBP physically interacts with the Notch transcriptional coactivation complex through C promoter-binding factor 1 (CBF1; RBPJ) and strengthens the association between the Notch intracellular domain (NICD) and CBF1, resulting in increased NICD recruitment to the promoter region of a Notch target gene. Our data indicate that TRBP is a novel transcriptional coactivator of the Notch signaling pathway, playing an important role in neural stem cell regulation during mammalian brain development.

**KEY WORDS:** TRBP, Notch, Embryonic neural stem cells, Transcriptional activation, Central nervous system development

## INTRODUCTION

Mammalian brain development requires the tightly regulated spatiotemporal control of neural stem cell proliferation and differentiation for proper neural cell composition, laminar organization and size of a mature brain (Rakic, 1995; Breunig et al., 2011). This regulation is achieved by numerous cellular signaling pathways triggered by various cues, such as secretory factors and cell surface ligands (Yoon and Gaiano, 2005; Kohwi and Doe, 2013).

Transactivation response element RNA-binding protein (TRBP; also known as TARBP2) was initially identified as a human immunodeficiency virus type 1 (HIV-1) TAR RNA-binding partner (Gatignol et al., 1991; Dorin et al., 2003), and received much attention because of its activity in enhancing the catalytic activity of Dicer, a key regulator in microRNA biogenesis (Chendrimada et al., 2005; Haase et al., 2005). However, more recently, TRBP has been proposed to have microRNA-independent functions in various cellular events, including

cell growth, oncogenesis and antiviral response by mediating cross-talk between signal transduction pathways (Daniels and Gatignol, 2012). Interestingly, a search for TRBP using Eurexpress, a transcriptome atlas database for the mouse embryo ([www.eurexpress.org](http://www.eurexpress.org)), showed *in situ* hybridization results of expression in the ventricular zone, but its role there has not yet been determined.

Notch controls crucial functions in many tissues in adults as well as at various developmental stages (Yoon and Gaiano, 2005). In the developing mammalian central nervous system, Notch controls maintenance and cell fate choices of neural stem cells (Yoon et al., 2004). In this study, we establish an unexpected functional link between TRBP and the Notch signaling pathway in the regulation of neural stem cell characteristics during mammalian brain development.

## RESULTS AND DISCUSSION

We first confirmed TRBP expression in the mouse embryonic brain by *in situ* hybridization and immunofluorescence staining. Both techniques revealed TRBP expression in the germinal zones lining the lateral ventricles in the embryonic day (E) 13.5 forebrain, implying a potential role in neural progenitor populations (Fig. 1A,B). To test the functions of TRBP in embryonic neural progenitor cells *in vitro*, we began with neurospheres (Singec et al., 2006) isolated after transducing E14.5 neural progenitors with a TRBP-expressing retroviral vector MSIG (Han et al., 2015). Expression of TRBP gave rise to an increase in the number and size of neurospheres compared with control virus (Fig. 1C), suggesting that TRBP enhances the self-renewal capacity of neural progenitor cells *in vitro*. Increased expression of the neural stem cell markers Sox2 and Pax6 (Ellis et al., 2004; Pevny and Nicolis, 2010) supported this idea (Fig. 1E,G). Consistent with these results, TRBP knockdown by short hairpin RNA (shRNA) reduced the size and number of neurospheres and the expression of Sox2 and Pax6 (Fig. 1D,F,G). Providing important confirmation of our results in an *in vivo* context, we found that cells expressing the TRBP vector were more likely to express Sox2 and be located in the ventricular/subventricular zone (VZ/SVZ) after *in utero* electroporation (Fig. 1H,I). Interestingly, we also noted that TRBP increased astrocyte production at the expense of neurogenesis under differentiating conditions *in vitro* (Fig. 1J,K); this is reminiscent of Notch effects in the embryonic central nervous system (Yoon and Gaiano, 2005; Jang et al., 2014).

These results led us to examine whether TRBP regulates the Notch signaling pathway. Indeed, in primary neural progenitor cells TRBP increased mRNA expression of the Notch targets *Hes1* and *Hes5* to levels comparable to those driven by the Notch intracellular domain (NICD; a constitutively active form of Notch) (Yang et al., 2011), and *Hey1* mRNA expression to a level ~50% of NICD-stimulated levels (Fig. 2A-C). TRBP shRNA-infected cells had a greater than 50% reduction in the levels of *Hes1*, *Hes5* and *Hey1*

<sup>1</sup>Department of Genetic Engineering, College of Biotechnology and Bioengineering, Sungkyunkwan University, Suwon, Gyeonggi-do 16419, South Korea. <sup>2</sup>Department of Neurology, University of California San Francisco, San Francisco, CA 94158, USA.

\*Author for correspondence ([keejung@skku.edu](mailto:keejung@skku.edu))

 K.Y., 0000-0002-2361-9039

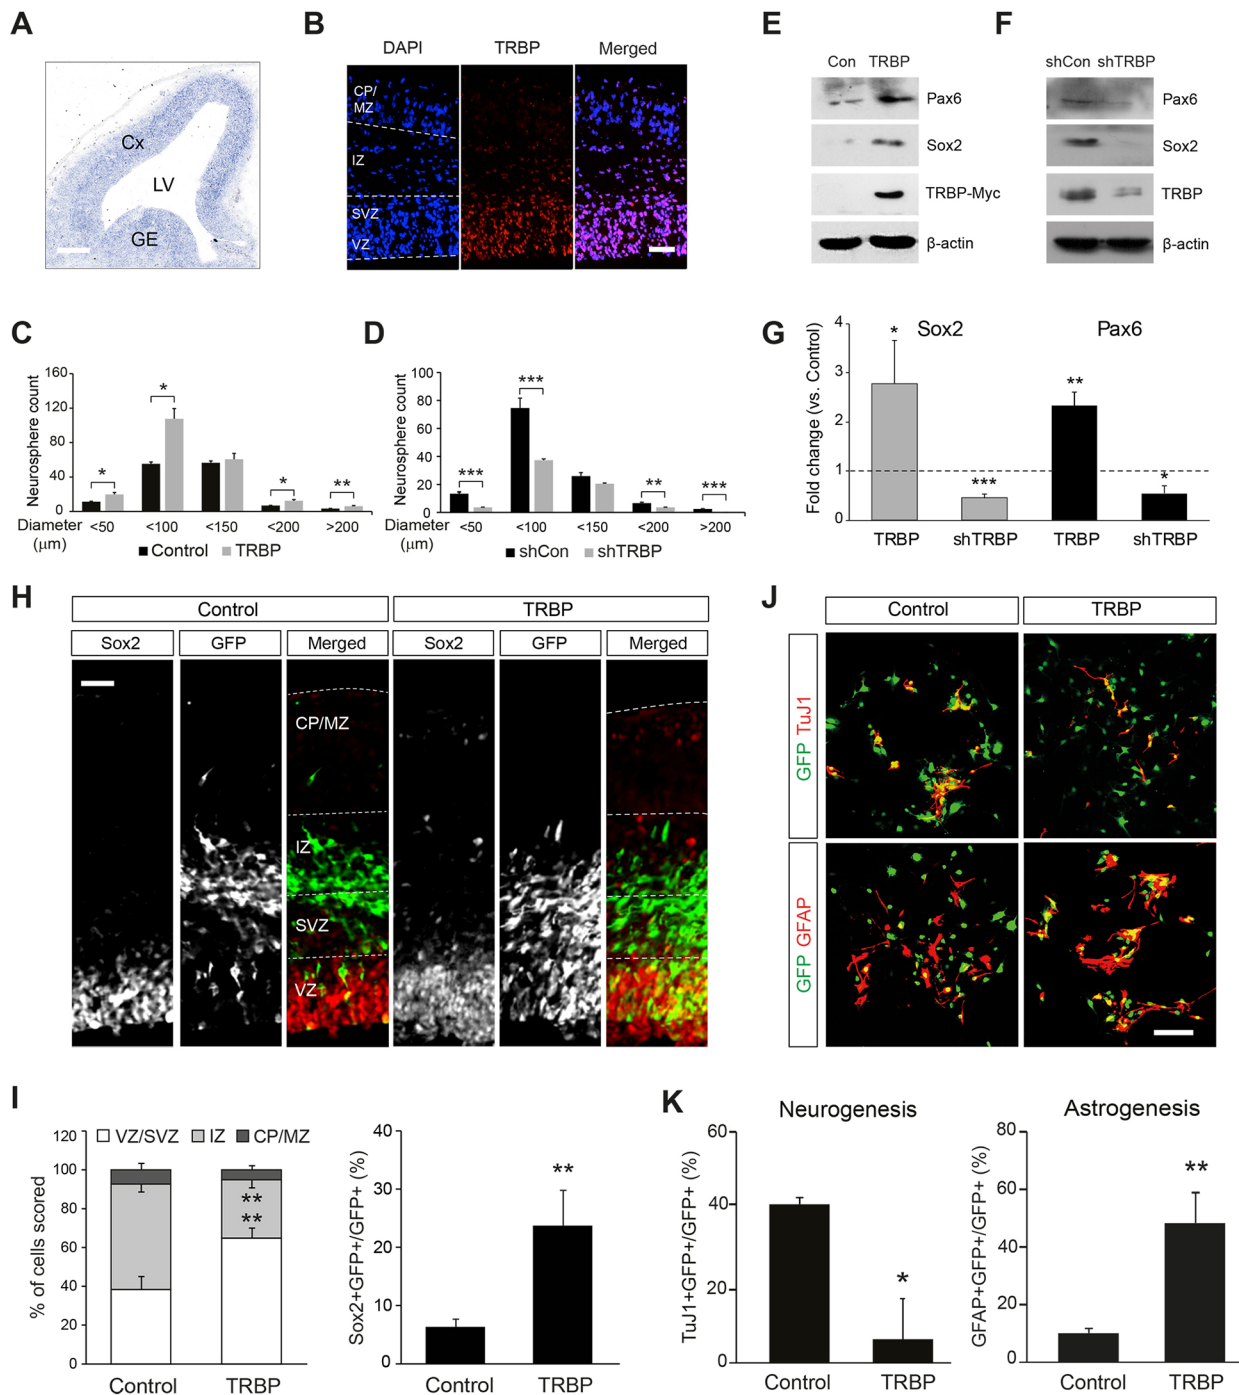

**Fig. 1. TRBP enhances embryonic neural stem cell properties.** (A,B) *Trbp* gene expression pattern in the E13.5 mouse forebrain was determined by (A) *in situ* hybridization and (B) immunofluorescence after antigen retrieval using proteinase K digestion. (C,D) Neurosphere assay using mouse E14.5 primary neural progenitors transduced with a retroviral vector expressing (C) TRBP or (D) shRNA specific to TRBP (shTRBP). (E-G) Western blot analysis for Pax6 and Sox2 proteins of neural progenitor cell lysates infected with (E) TRBP-expressing or (F) shTRBP-expressing retrovirus. Quantification is shown in G. (H,I) Double immunolabeling of E15.5 brain sections electroporated *in utero* with TRBP-expressing plasmid at E13.5 using anti-GFP (reporter, green) and Sox2 (red) antibodies (H). Quantification is shown in I. (J,K) Representative immunostaining using anti-GFP (green) together with anti-βIII-tubulin (clone TuJ1; neuron, red) or GFAP (astrocyte, red) antibodies after *in vitro* differentiation of E14.5 neural progenitor cells. Quantification is shown in K. Scale bars: 200 μm in A; 50 μm in B,H,J. CP, cortical plate; Cx, cortex; GE, ganglionic eminence; IZ, intermediate zone; LV, lateral ventricles; MZ, marginal zone; SVZ, subventricular zone; VZ, ventricular zone. All error bars represent s.d. \* $P < 0.05$ , \*\* $P < 0.01$ , \*\*\* $P < 0.001$ , Student's *t*-test.

mRNAs (Fig. 2D-F). However, unlike the qRT-PCR results using primary neural progenitor cells, TRBP alone did not activate the Notch reporter driven by a C promoter-binding factor 1 (CBF1)-responsive element (four CBF1 binding sites and the basal SV40 promoter) in NIH3T3 cells (Fig. 2G), having undetectable levels of

Notch activity. Instead, TRBP dramatically increased promoter activity only when NICD was present, suggesting that upregulation of Notch target gene transcription by TRBP occurs at the promoter level and is NICD dependent. Moreover, co-expression of a dominant-negative form of mastermind-like 1 (dnMAML1), a key

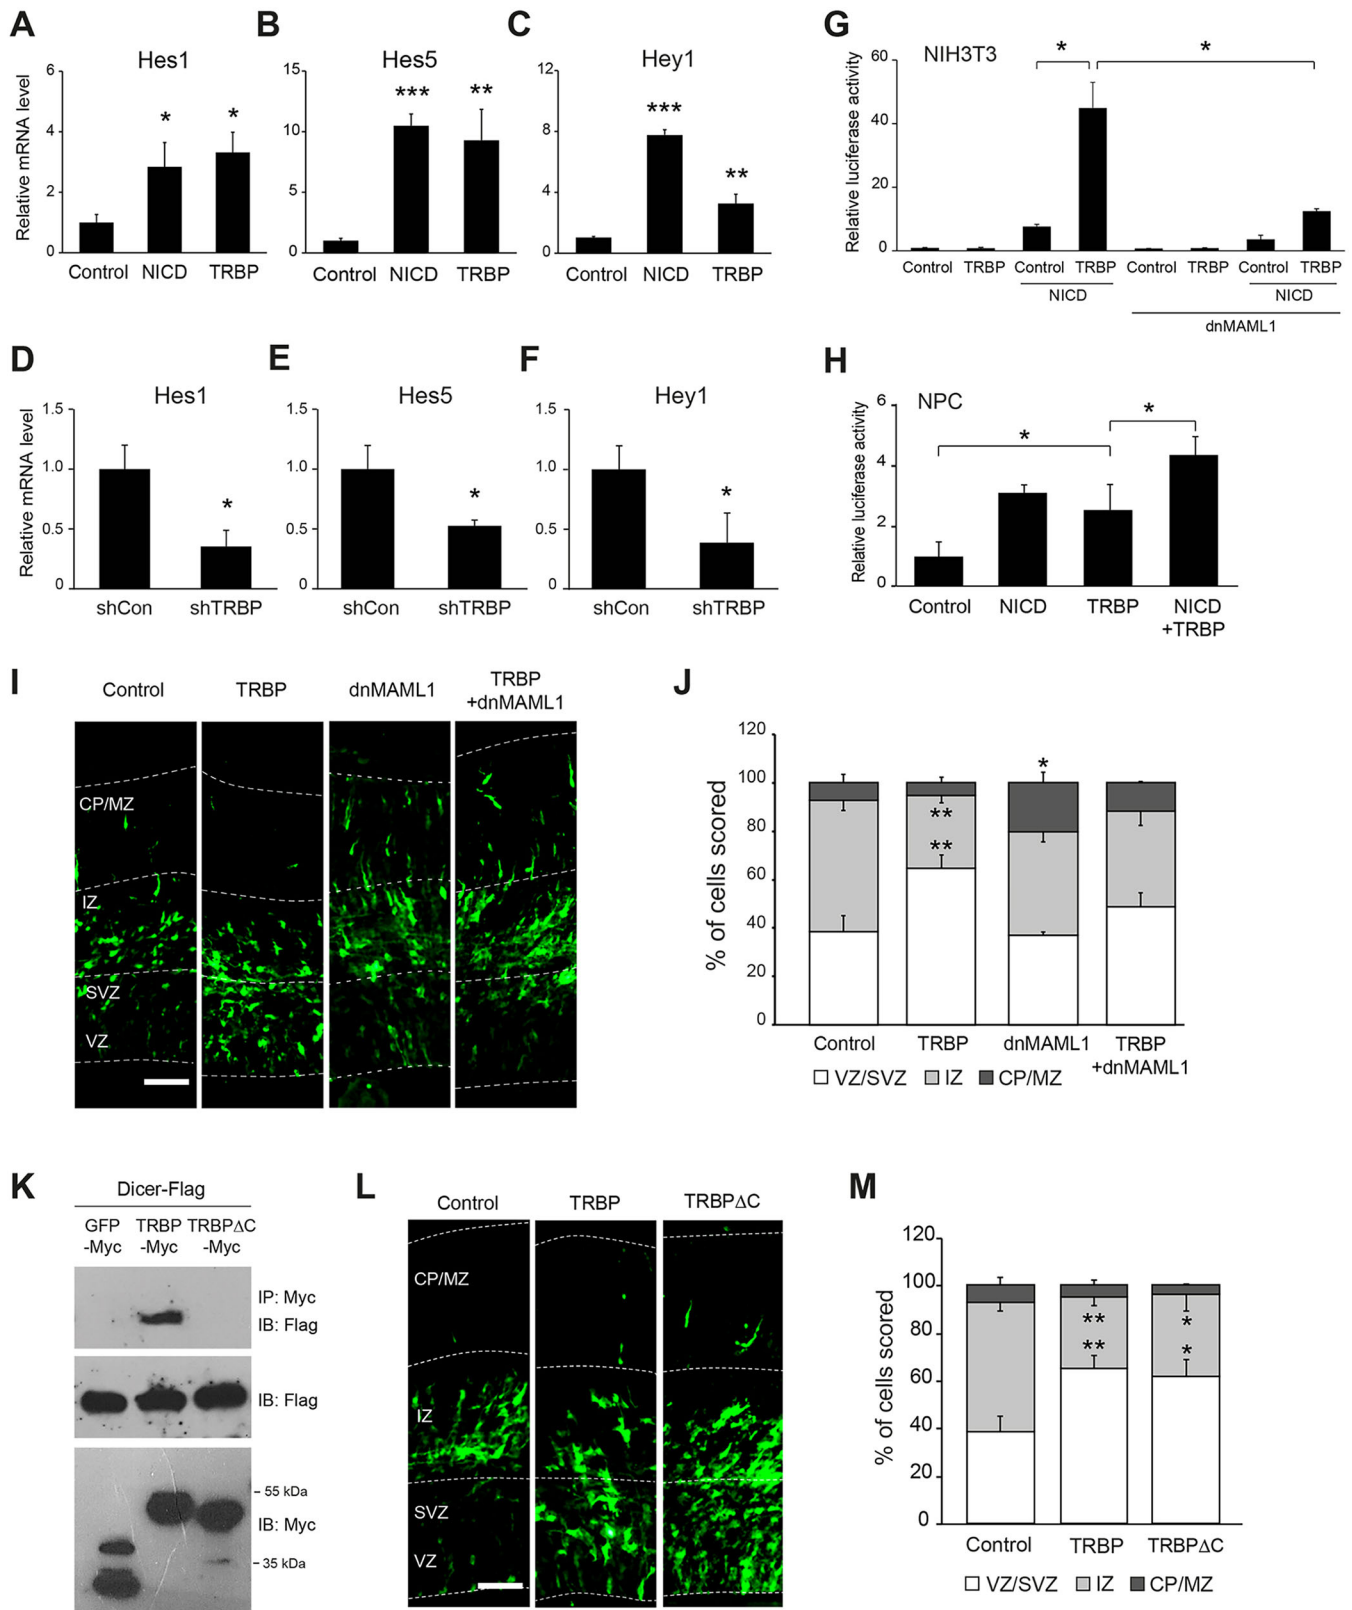

**Fig. 2. TRBP increases Notch-dependent transcription.** (A-F) mRNA expression levels of each indicated Notch target gene as measured by qRT-PCR, 2 days after E14.5 primary neural progenitor cells were transduced with retroviral vectors expressing (A-C) TRBP or (D-F) shTRBP. (G,H) Luciferase assay was used to detect the activation of a Notch reporter consisting of firefly luciferase fused to a CBF1-responsive element. (G) NIH3T3 or (H) E14.5 primary neural progenitor cells were transfected with a Notch reporter and the indicated expression vectors. Cells were harvested at 2 days post-transfection for luciferase assays. (I,L) Anti-GFP immunolabeling of E15.5 brain sections electroporated *in utero* with the indicated expression vectors at E13.5. (J,M) Quantification of I and L, respectively. (K) Co-IP assays using HEK 293T cells showing that a TRBP mutant (TRBPΔC) is deficient in binding to Dicer. Scale bars: 50  $\mu$ m. Error bars represent s.d. \* $P$ <0.05, \*\* $P$ <0.01, \*\*\* $P$ <0.001, Student's *t*-test.

component of the Notch coactivation complex (Wu et al., 2000; Weng et al., 2003), disrupted the effects of TRBP (Fig. 2G,I,J), indicating that TRBP action requires core Notch coactivational machinery. qRT-PCR revealed that gene expression levels of Notch coactivational complex members were unchanged by the gain- or loss-of-function of TRBP in primary neural progenitor cells (Fig. S1A,B), suggesting that the enhanced Notch target promoter activation by TRBP was not due to the increased gene expression of a coactivational complex member. In primary neural progenitor cells, forced expression of TRBP alone increased Notch-dependent promoter activity, presumably because of endogenous NICD present in these cells, and co-transfection with NICD-expressing vector enhanced activity even further (Fig. 2H), consistent with the results shown in Fig. 2A-C. Facilitated *in vivo* activation of the *Hes5* promoter was also observed when a Discosoma Red (DsRed) reporter driven by the *Hes5* promoter was introduced together with the TRBP plasmid into the brain (Fig. S2).

Since the best-known function of TRBP is to enhance Dicer activity, we tested whether Dicer is involved in TRBP enhancement of Notch pathway activation by generating a TRBP mutant lacking

Dicer binding ability (TRPBΔC; Fig. 2K) based on a previous report (Daniels et al., 2009). This TRBP mutant still efficiently increased *Hes5* mRNA production and Sox2 protein levels (Fig. S3A,B) in neural progenitor cells *in vitro*, and induced cell localization to the VZ/SVZ *in vivo* (Fig. 2L,M) at wild-type levels, strongly indicating that TRBP enhancement of Notch pathway activation is Dicer independent. Previous studies also support our observations: the expression of *Hes* genes was not altered in Dicer-ablated embryonic brains (Peng et al., 2012), and neural progenitors lacking Dicer did not precociously exit the VZ and still retained progenitor marker expression *in vivo* (Knuckles et al., 2012).

Since TRBP is a nuclear protein and simultaneously increases the transcription of several Notch target genes, one possible mechanism explaining these observations might involve direct modulation of the transcriptional machinery. To test this hypothesis, we used co-immunoprecipitation (co-IP) assays with the HEK 293T cell line to explore the potential interactions between TRBP and the Notch transcriptional activation complex. Myc-tagged NICD co-immunoprecipitated with TRBP-HA protein, whereas no band was detected from GFP-HA-transfected cells (Fig. 3A). Likewise, clear

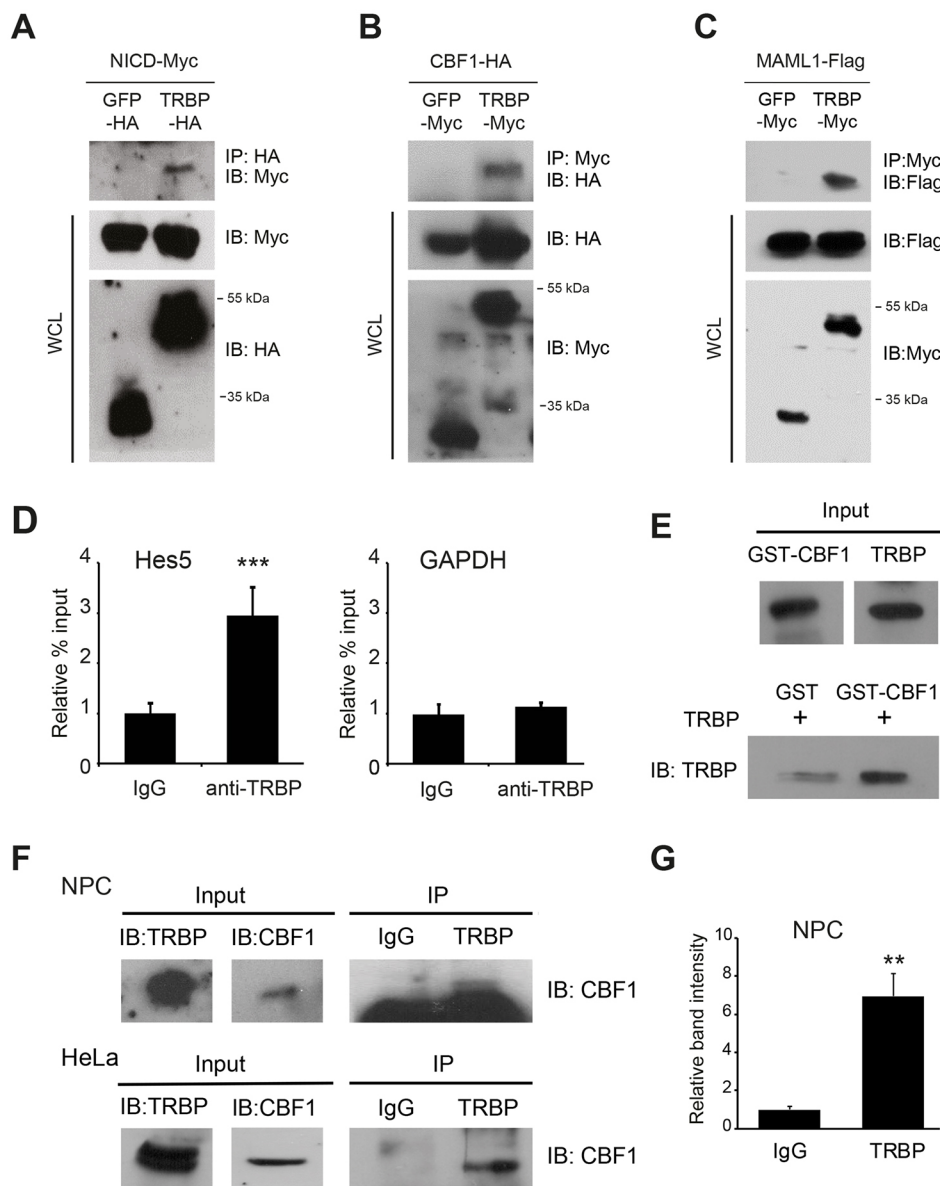

**Fig. 3. TRBP interacts with the Notch transcriptional coactivation complex.**

(A-C) Representative western blots showing co-IP of TRBP with each component of the Notch coactivational complex using the HEK 293T cell line: (A) NICD, (B) CBF1 and (C) MAML1. (D) ChIP assay using primary neural progenitor chromatin extracts and anti-TRBP antibody, and subsequent real-time PCR analysis for the genomic *Hes5* and *Gapdh* promoter regions. (E) GST pull-down assay using *E. coli*-expressed recombinant GST-CBF1 and TRBP proteins. (F,G) Co-IP assays were performed with anti-TRBP and anti-CBF1 antibodies to show endogenous interactions between TRBP and CBF1 in primary mouse progenitors and HeLa cells (F). Quantification of neural progenitor results is shown in G. NPC, neural progenitor cell; WCL, whole-cell lysate. Error bars represent s.d. \*\* $P < 0.01$ , \*\*\* $P < 0.001$ , Student's *t*-test.

association of TRBP with CBF1 (RBPJ) or MAML1 was also observed (Fig. 3B,C). TRBP co-immunoprecipitated well with CBF1 in RNase-treated samples, suggesting that TRBP interacts with Notch components in an RNA-independent manner (Fig. S4A,B).

Consistent with the co-IP results, a chromatin immunoprecipitation (ChIP) assay using chromatin extracts derived from E14.5 primary neural progenitor cells and anti-TRBP antibody revealed that endogenous TRBP protein is recruited to the genomic *Hes5* promoter region (Fig. 3D). Furthermore, the glutathione S-transferase (GST)-tagged CBF1 protein was able to pull down TRBP in a cell-free *in vitro* binding assay (Fig. 3E), suggesting that CBF1 is a direct binding target of TRBP. The interaction between endogenous TRBP and CBF1 was also confirmed in primary mouse neural progenitors and HeLa cells by co-IP assays with anti-TRBP and anti-CBF1 antibodies (Fig. 3F,G).

Finally, we examined the functional consequences of TRBP association with the Notch transactivational complex using the HEK 293T cell line. Overexpression of TRBP caused an increase in association between CBF1 and NICD by up to 2.5-fold (Fig. 4A), and a mutant TRBP protein (TRBPM) deficient in dsRNA-binding domains and binding activity to CBF1 lost this ability (Fig. 4B,C). Furthermore, this interaction was significantly weakened by TRBP knockdown (Fig. 4D). Considering the sizable amount of residual TRBP protein in TRBP shRNA-expressing cells, this degree of reduction strongly indicates that TRBP plays an important role in

stabilizing the Notch coactivational complex at physiological levels.

The importance of TRBP interaction with CBF1 was further confirmed *in vivo*. Cell exit from the VZ/SVZ was prominent 2 days post-electroporation of an shRNA vector against TRBP at E13.5, and this change was reversed by wild-type TRBP and not by TRBPM (Fig. 4E,F), indicating that TRBP-induced augmentation of neural stem cell properties is strictly CBF1 binding dependent.

Because both TRBP and CBF1 are nuclear and are ubiquitously expressed in many types of tissues (Lu and Lux, 1996; Daniels and Gagnon, 2012), it is plausible to hypothesize that TRBP may be a constitutive component of the Notch coactivation complex. Our data showing interaction between TRBP and CBF1 in non-neural human HeLa cells (Fig. 3F) provides support for this idea. Examination of the role of TRBP in cellular events such as oncogenesis or hematopoiesis, in which Notch signaling plays a pivotal role, would yield insight into the potentially ubiquitous importance of this Notch coactivation complex member.

## MATERIALS AND METHODS

### Animals

All animal studies were carried out in accordance with protocols approved by the Institutional Animal Care and Use Committee at Sungkyunkwan University (SKKUIACUC-2016-04-0005-2). Timed-pregnant CD1 mice were obtained from Koatech (Korea) and used for neural progenitor cell preparation and *in utero* electroporation.

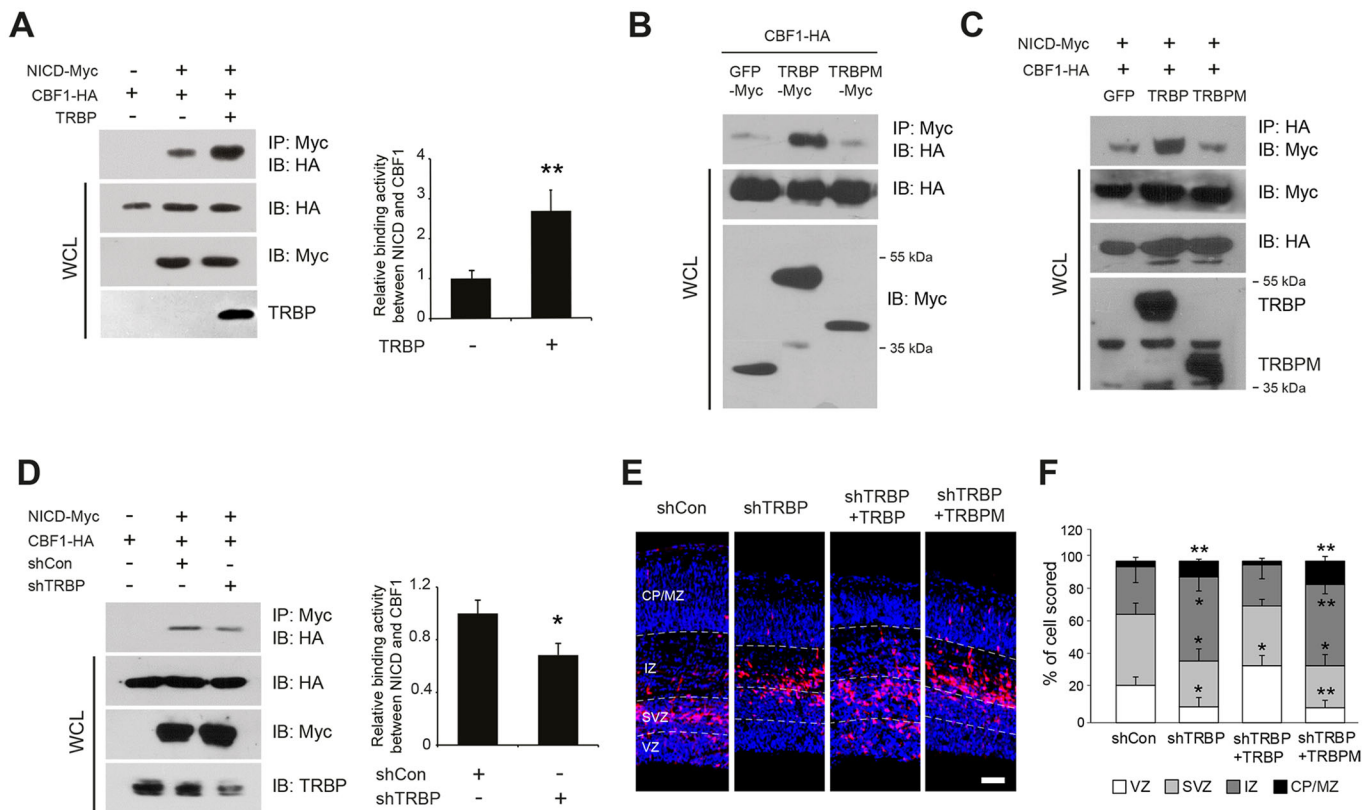

**Fig. 4. TRBP reinforces association between NICD and CBF1.** (A,D) The binding affinity between NICD and CBF1 upon (A) overexpression or (D) knockdown of TRBP was examined by co-IP assays using the HEK 293T cell line. Co-immunoprecipitated CBF1-HA protein levels were normalized to CBF1-HA protein levels in the respective whole-cell lysates. (B,C) Co-IP assays show that a TRBP mutant (TRBPM) lacking dsRNA-binding domains and deficient in binding to CBF1 (B) does not enhance the NICD-CBF1 interaction (C). TRBPM was identified through domain-mapping experiments. (E,F) Immunolabeling of E15.5 brain sections electroporated *in utero* with the indicated expression vectors at E13.5 using anti-GFP and Alexa Fluor 555-conjugated secondary antibodies (E). Quantification is shown in F. Scale bar: 50  $\mu$ m. All error bars represent s.d. \* $P$ <0.05, \*\* $P$ <0.01, Student's *t*-test.

### In situ hybridization

*In situ* hybridization was conducted according to standard protocols (Siegenthaler et al., 2009). Digoxigenin-labeled sense and antisense riboprobes were generated from pGEM-T Easy vectors (Promega) containing cDNA sequences corresponding to residues 1-623 of mouse TRBP.

### Co-immunoprecipitation (co-IP)

For immunoprecipitations of tagged proteins, transfected HEK 293T cells obtained from the American Type Culture Collection (ATCC, Manassas, VA, USA) were lysed in immunoprecipitation lysis buffer (50 mM Tris-HCl pH 7.5, 150 mM NaCl, 0.5% Triton X-100, 1 mM EDTA) with protease inhibitor (Sigma). Total proteins were incubated with primary antibody against a tag [mouse anti-Myc (Santa Cruz Biotechnology, sc-40X; 1:1000), mouse anti-HA (Abcam, ab16918; 1:500) or mouse anti-FLAG (Sigma, F1804; 1:500)] and protein G-conjugated beads (Invitrogen) at 4°C overnight. Beads were washed three times with lysis buffer and 2× sample buffer was added. Samples were then boiled for 10 min, and beads were removed by centrifuging at 17,000 g for 30 min. Proteins were resolved by SDS-PAGE and subjected to immunoblotting using an anti-tag antibody. ImageJ software (<http://rsb.info.nih.gov/ij/>) was used to quantify band intensity of the immunoblot. Immunoprecipitations of endogenous TRBP with anti-TRBP antibody (a kind gift from Dr V. N. Kim, Seoul National University, Seoul, Korea) using mouse embryonic neural progenitors or HeLa cells, and subsequent immunoblotting with anti-CBF1 antibody (Cosmo Bio, ZRBP2; 1:100) were performed in a similar manner.

### GST pull-down assays

The *Trbp* and *Cbfl* genes were cloned into the bacterial expression vector pGEX-4T1 (GE Healthcare Life Science), which has a GST tag at the N-terminus and a thrombin cleavage site, and GST fusion proteins were expressed in *E. coli* BL21 cells by the IPTG induction method and purified as described (Lee et al., 2006). Recombinant TRBP protein without the GST tag was prepared by incubating GST-TRBP protein with 1 U/μl thrombin (Sigma) at room temperature overnight, followed by inactivation with 1 mM PMSF. GST alone or GST-CBF1 protein coupled to glutathione-agarose beads (Sigma) was incubated with thrombin-cleaved TRBP protein at 4°C overnight. The mixtures were washed three times with PBS and eluted with glutathione elution buffer [50 mM Tris-HCl pH 8.0, 10 mM reduced glutathione (Sigma)]. The samples were then subjected to SDS-PAGE followed by western blot analysis.

### Statistical analysis

Statistical tests were performed using SPSS version 23 (IBM). All data represent three or more independent experiments.

### Acknowledgements

We thank Dr V. N. Kim for the kind gift of anti-TRBP antibody.

### Competing interests

The authors declare no competing or financial interests.

### Author contributions

S.-H.B., D.H., J.K., M.K., J.Y.C. and H.X.N. carried out experiments and analyzed data. K.Y. designed the study and wrote the manuscript with contribution from S.J.P.

### Funding

This research was supported by the Basic Science Research Program through the National Research Foundation of Korea funded by the Ministry of Science, ICT and Future Planning (2015R1A2A2A01005687).

### Supplementary information

Supplementary information available online at <http://dev.biologists.org/lookup/doi/10.1242/dev.139493.supplemental>

### References

Breunig, J. J., Haydar, T. F. and Rakic, P. (2011). Neural stem cells: historical perspective and future prospects. *Neuron* **70**, 614-625.

- Chendrimada, T. P., Gregory, R. I., Kumaraswamy, E., Norman, J., Cooch, N., Nishikura, K. and Shiekhattar, R. (2005). TRBP recruits the Dicer complex to Ago2 for microRNA processing and gene silencing. *Nature* **436**, 740-744.
- Daniels, S. M. and Gatignol, A. (2012). The multiple functions of TRBP, at the hub of cell responses to viruses, stress, and cancer. *Microbiol. Mol. Biol. Rev.* **76**, 652-666.
- Daniels, S. M., Melendez-Peña, C. E., Scarborough, R. J., Daher, A., Christensen, H. S., El Far, M., Purcell, D. F. J., Lainé, S. and Gatignol, A. (2009). Characterization of the TRBP domain required for dicer interaction and function in RNA interference. *BMC Mol. Biol.* **10**, 38.
- Dorin, D., Bonnet, M. C., Bannwarth, S., Gatignol, A., Meurs, E. F. and Vaquero, C. (2003). The TAR RNA-binding protein, TRBP, stimulates the expression of TAR-containing RNAs in vitro and in vivo independently of its ability to inhibit the dsRNA-dependent kinase PKR. *J. Biol. Chem.* **278**, 4440-4448.
- Ellis, P., Fagan, B. M., Magness, S. T., Hutton, S., Taranova, O., Hayashi, S., McMahon, A., Rao, M. and Pevny, L. (2004). SOX2, a persistent marker for multipotential neural stem cells derived from embryonic stem cells, the embryo or the adult. *Dev. Neurosci.* **26**, 148-165.
- Gatignol, A., Buckler-White, A., Berkhout, B. and Jeang, K. T. (1991). Characterization of a human TAR RNA-binding protein that activates the HIV-1 LTR. *Science* **251**, 1597-1600.
- Haase, A. D., Jaskiewicz, L., Zhang, H., Lainé, S., Sack, R., Gatignol, A. and Filipowicz, W. (2005). TRBP, a regulator of cellular PKR and HIV-1 virus expression, interacts with Dicer and functions in RNA silencing. *EMBO Rep.* **6**, 961-967.
- Han, D., Byun, S.-H., Park, S., Kim, J., Kim, I., Ha, S., Kwon, M. and Yoon, K. (2015). YAP/TAZ enhance mammalian embryonic neural stem cell characteristics in a Tead-dependent manner. *Biochem. Biophys. Res. Commun.* **458**, 110-116.
- Jang, J., Byun, S.-H., Han, D., Lee, J., Kim, J., Lee, N., Kim, I., Park, S., Ha, S., Kwon, M. et al. (2014). Notch intracellular domain deficiency in nuclear localization activity retains the ability to enhance neural stem cell character and block neurogenesis in mammalian brain development. *Stem Cells Dev.* **23**, 2841-2850.
- Knuckles, P., Vogt, M. A., Lugert, S., Milo, M., Chong, M. M. W., Hautbergue, G. M., Wilson, S. A., Littman, D. R. and Taylor, V. (2012). Drosha regulates neurogenesis by controlling Neurogenin 2 expression independent of microRNAs. *Nat. Neurosci.* **15**, 962-969.
- Kohwi, M. and Doe, C. Q. (2013). Temporal fate specification and neural progenitor competence during development. *Nat. Rev. Neurosci.* **14**, 823-838.
- Lee, Y., Hur, I., Park, S.-Y., Kim, Y.-K., Suh, M. R. and Kim, V. N. (2006). The role of PACT in the RNA silencing pathway. *EMBO J.* **25**, 522-532.
- Lu, F. M. and Lux, S. E. (1996). Constitutively active human Notch1 binds to the transcription factor CBF1 and stimulates transcription through a promoter containing a CBF1-responsive element. *Proc. Natl. Acad. Sci. USA* **93**, 5663-5667.
- Peng, C., Li, N., Ng, Y.-K., Zhang, J., Meier, F., Theis, F. J., Merckenschlager, M., Chen, W., Würst, W. and Prakash, N. (2012). A unilateral negative feedback loop between miR-200 microRNAs and Sox2/E2F3 controls neural progenitor cell-cycle exit and differentiation. *J. Neurosci.* **32**, 13292-13308.
- Pevny, L. H. and Nicolis, S. K. (2010). Sox2 roles in neural stem cells. *Int. J. Biochem. Cell Biol.* **42**, 421-424.
- Rakic, P. (1995). A small step for the cell, a giant leap for mankind: a hypothesis of neocortical expansion during evolution. *Trends Neurosci.* **18**, 383-388.
- Siegenthaler, J. A., Ashique, A. M., Zerbali, K., Patterson, K. P., Hecht, J. H., Kane, M. A., Foliás, A. E., Choe, Y., May, S. R., Kume, T. et al. (2009). Retinoic acid from the meninges regulates cortical neuron generation. *Cell* **139**, 597-609.
- Singec, I., Knoth, R., Meyer, R. P., Maciaczyk, J., Volk, B., Nikkhah, G., Frotscher, M. and Snyder, E. Y. (2006). Defining the actual sensitivity and specificity of the neurosphere assay in stem cell biology. *Nat. Methods* **3**, 801-806.
- Weng, A. P., Nam, Y., Wolfe, M. S., Pear, W. S., Griffin, J. D., Blacklow, S. C. and Aster, J. C. (2003). Growth suppression of pre-T acute lymphoblastic leukemia cells by inhibition of Notch signaling. *Mol. Cell. Biol.* **23**, 655-664.
- Wu, L., Aster, J. C., Blacklow, S. C., Lake, R., Artavanis-Tsakonas, S. and Griffin, J. D. (2000). MAML1, a human homologue of Drosophila mastermind, is a transcriptional co-activator for NOTCH receptors. *Nat. Genet.* **26**, 484-489.
- Yang, M.-S., Hong, J.-S., Kim, S.-T., Lee, K.-Y., Park, K. W., Kwon, S.-T., Kweon, D.-H., Koh, Y. H., Gaiano, N. and Yoon, K. (2011). Among gamma-secretase substrates Notch1 alone is sufficient to block neurogenesis but does not confer self-renewal properties to neural stem cells. *Biochem. Biophys. Res. Commun.* **404**, 133-138.
- Yoon, K. and Gaiano, N. (2005). Notch signaling in the mammalian central nervous system: insights from mouse mutants. *Nat. Neurosci.* **8**, 709-715.
- Yoon, K., Nery, S., Rutlin, M. L., Radtke, F., Fishell, G. and Gaiano, N. (2004). Fibroblast growth factor receptor signaling promotes radial glial identity and interacts with Notch1 signaling in telencephalic progenitors. *J. Neurosci.* **24**, 9497-9506.
